# Supplementary material
Source: MDPI journal article supplement (https://www.mdpi.com/2227-9717/7/12/877)
Supplement: s1 [file s1]

## Supplementary

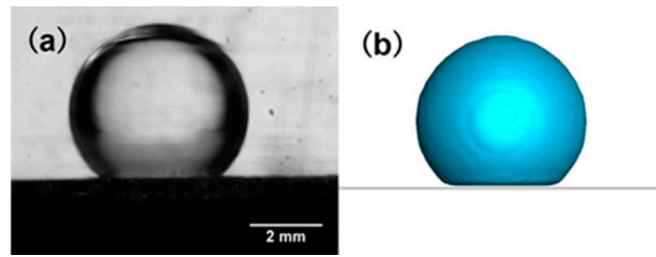

**Figure S1.** (a) Image of a water droplet surrounded by silicon oil on a pure nickel surface and (b) a droplet simulated by LBM with  $G_{w,k}$  of  $\pm 0.06$ .

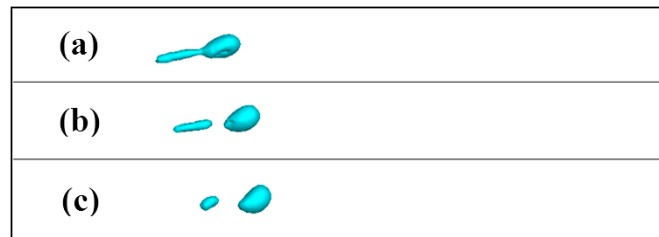

**Figure S2.** Evolution of one droplet breakup: (a)  $t=0.09$  s, (b)  $t=0.096$  s, and (c)  $t=0.102$  s.

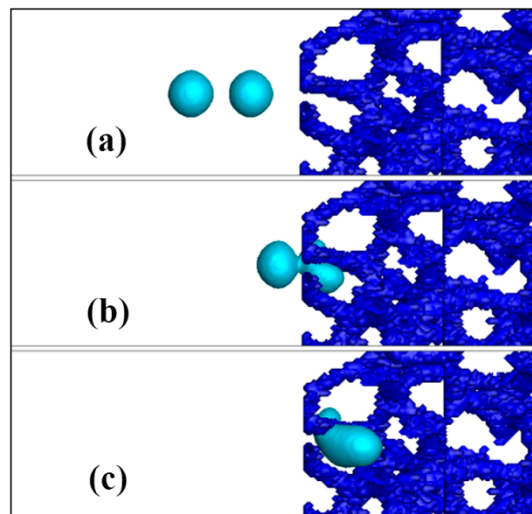

**Figure S3.** Hydrodynamics of two successive droplets passing a metal foam with  $D_b$  of 2.00 ( $L_d = 7.32$ ,  $Ca = 0.061$ ,  $D_d = 1.33$ ): (a)  $t=0.12$  s, (b)  $t=0.144$  s, and (c)  $t=0.168$  s.
